# Supplementary material
Source: Elsevier journal article supplement (https://www.sciencedirect.com/science/article/pii/S1885585726000526)
Supplement: mmc1 [file mmc1.pdf]

# **SUPPLEMENTARY DATA**

**Table S1. Enrolling centers**

**Table S2. Current recommendations for grading the severity of native aortic regurgitation according to the main qualitative, semi-quantitative and quantitative parameters**

**Table S3. Current recommendations for grading the severity of post-TAVI aortic regurgitation according to the main qualitative, semi-quantitative and quantitative parameters**

**Table S4. Clusters and sizes of transcatheter heart valves**

**Table S5. Two-sided test of the scaled Schoenfeld residuals over time**

**Table S6. Subgroup analysis according to post-TAVR AR**

**Table S7. Subgroup analysis according to raphe calcification**

**Table S8. Subgroup analysis according to raphe localization**

**Table S9. Sensitivity analysis stratified by baseline AR severity into three groups**

**Table S1. Enrolling centers**

| <b>Center</b>                                                                  | <b>Enrolled patients</b> |
|--------------------------------------------------------------------------------|--------------------------|
| Kerkhoff-Klinik, Bad Nauheim, Germany                                          | 244                      |
| The Heart Center, Rigshospitalet, Copenhagen University Hospital, Denmark      | 160                      |
| A.O.U. Policlinico "G. Rodolico-San Marco", Catania, Italy                     | 88                       |
| Clinique Pasteur, Toulouse, France                                             | 57                       |
| Fondazione Policlinico Universitario A. Gemelli, Rome, Italy                   | 53                       |
| Cedars-Sinai Heart Institute, Los Angeles, CA, USA                             | 41                       |
| Leeds Teaching Hospitals NHS Trust, Leeds, UK                                  | 40                       |
| Galway University Hospitals, Ireland                                           | 33                       |
| Ospedale San Raffaele, Milano, Italy                                           | 30                       |
| Università di Padova, Padova, Italy                                            | 27                       |
| ASST Spedali Civili di Brescia, University of Brescia, Italy                   | 22                       |
| Montefiore Medical Center, Albert Einstein College of Medicine, Bronx, NY, USA | 21                       |
| West China Hospital, Sichuan University, China                                 | 20                       |
| IRCCS Azienda Ospedaliero-Universitaria di Bologna, Italy                      | 18                       |
| University Clinical Hospital of Valladolid, Valladolid, Spain                  | 17                       |
| Fondazione Poliambulanza Istituto Ospedaliero, Brescia, Italy                  | 14                       |
| Ca' Foncello Hospital, Treviso, Italy                                          | 15                       |
| IRCCS Policlinico San Donato, San Donato Milanese, Milano, Italy               | 13                       |
| Azienda Ospedaliero-Universitaria Pisana, Pisa, Italy                          | 12                       |
| IRCCS Humanitas Research Hospital, Rozzano-Milano, Italy                       | 12                       |
| German Heart Centre Munich, München, Germany                                   | 10                       |
| Edith Wolfson Medical Center, Holon, Israel                                    | 5                        |
| IRCCS Ospedale Galeazzi-Sant'Ambrogio, Milano, Italy                           | 3                        |
| Clinica Mediterranea, Napoli, Italy                                            | 1                        |

**Table S2. Current recommendations for grading the severity of native aortic regurgitation according to the main qualitative, semi-quantitative and quantitative parameters**

|                                                  |                                                          |
|--------------------------------------------------|----------------------------------------------------------|
| Aortic leaflets                                  | Abnormal/flail, or wide coaptation defect                |
| LV size                                          | Usually dilated                                          |
| Diastolic flow reversal in descending aorta (PW) | Prominent holodiastolic reversal with EDV $\geq 20$ cm/s |
| Jet width/LVOT width, central jets (%)           | $\geq 65$                                                |
| VC width (cm)                                    | $> 0.6$                                                  |
| PHT (msec)                                       | $< 200$                                                  |
| RVol (mL/beat)                                   | $\geq 60$                                                |
| RF (%)                                           | $\geq 50$                                                |
| EROA (cm <sup>2</sup> )                          | $\geq 0.30$                                              |

Abbreviations: EDV=end-diastolic volume; EROA=effective regurgitation orifice area; LV=left ventricle; LVOT=left ventricle outflow tract; PHT=pressure half-time; PW=pulsed wave; RF=regurgitant fraction; RVol=regurgitant volume; VC=vena contracta.

**Table S3. Current recommendations for grading the severity of post-TAVI aortic regurgitation according to the main qualitative, semi-quantitative and quantitative parameters**

|                                                  |                                                          |
|--------------------------------------------------|----------------------------------------------------------|
| Position of prosthesis                           | Frequently abnormal                                      |
| Stent and leaflet morphology                     | Frequently abnormal                                      |
| Diastolic flow reversal in descending aorta (PW) | Prominent holodiastolic reversal with EDV $\geq 20$ cm/s |
| Circumferential extent of PVR (%)                | $\geq 30$                                                |
| VC width (cm)                                    | $> 0.6$                                                  |
| PHT (msec)                                       | $< 200$                                                  |
| RVol (mL/beat)                                   | $\geq 60$                                                |
| RF (%)                                           | $\geq 50$                                                |
| EROA (cm <sup>2</sup> )                          | $\geq 0.30$                                              |

Abbreviations: EDV=end-diastolic volume; EROA=effective regurgitation orifice area; PHT=pressure half-time; PVR=paravalvular regurgitation; PW=pulsed wave; RF=regurgitant fraction; RVol=regurgitant volume; VC=vena contracta.

**Table S4. Clusters and sizes of transcatheter heart valves**

|                         | <b>Total<br/>(n = 956)</b> | <b>Mixed BAV disease<br/>(n = 134)</b> | <b>Pure BAV stenosis<br/>(n = 956)</b> |
|-------------------------|----------------------------|----------------------------------------|----------------------------------------|
| <b>Sapien 3/3 Ultra</b> | <b>409 (42.8)</b>          | <b>53 (39.2)</b>                       | <b>356 (43.3)</b>                      |
| 20 mm                   | 1                          | 0                                      | 1                                      |
| 23 mm                   | 67                         | 6                                      | 61                                     |
| 26 mm                   | 181                        | 22                                     | 159                                    |
| 29 mm                   | 160                        | 25                                     | 135                                    |
| <b>Evolut R</b>         | <b>164 (17.2)</b>          | <b>29 (21.6)</b>                       | <b>135 (16.4)</b>                      |
| 23 mm                   | 7                          | 0                                      | 7                                      |
| 26 mm                   | 25                         | 7                                      | 18                                     |
| 29 mm                   | 35                         | 6                                      | 29                                     |
| 34 mm                   | 97                         | 16                                     | 81                                     |
| <b>Evolut Pro/Pro +</b> | <b>216 (22.6)</b>          | <b>29 (21.7)</b>                       | <b>187 (22.7)</b>                      |
| 23 mm                   | 1                          | 1                                      | 0                                      |
| 26 mm                   | 49                         | 4                                      | 45                                     |
| 29 mm                   | 134                        | 18                                     | 116                                    |
| 34 mm                   | 32                         | 6                                      | 26                                     |
| <b>Acurate Neo</b>      | <b>52 (5.4)</b>            | <b>7 (5.2)</b>                         | <b>45 (5.5)</b>                        |
| 23 mm                   | 12                         | 3                                      | 9                                      |
| 25 mm                   | 17                         | 0                                      | 17                                     |
| 27 mm                   | 23                         | 4                                      | 19                                     |
| <b>Acurate Neo2</b>     | <b>38 (4.0)</b>            | <b>2 (1.5)</b>                         | <b>36 (4.4)</b>                        |
| 23 mm                   | 13                         | 1                                      | 12                                     |
| 25 mm                   | 12                         | 0                                      | 12                                     |
| 27 mm                   | 13                         | 1                                      | 12                                     |
| <b>Portico</b>          | <b>39 (4.1)</b>            | <b>5 (3.7)</b>                         | <b>34 (4.1)</b>                        |
| 23 mm                   | 3                          | 2                                      | 1                                      |
| 25 mm                   | 3                          | 0                                      | 3                                      |
| 27 mm                   | 10                         | 0                                      | 10                                     |
| 29 mm                   | 23                         | 3                                      | 20                                     |
| <b>Navitor</b>          | <b>14 (1.5)</b>            | <b>1 (0.7)</b>                         | <b>13 (1.6)</b>                        |
| 25 mm                   | 4                          | 0                                      | 4                                      |
| 27 mm                   | 6                          | 0                                      | 6                                      |
| 29 mm                   | 4                          | 1                                      | 3                                      |

|                     |                 |                |                |
|---------------------|-----------------|----------------|----------------|
| <b>Venus A plus</b> | <b>10 (1.1)</b> | <b>3 (2.2)</b> | <b>7 (0.9)</b> |
| 23 mm               | 1               | 0              | 1              |
| 26 mm               | 4               | 2              | 2              |
| 29 mm               | 5               | 1              | 4              |
| <b>Myval</b>        | <b>7 (0.7)</b>  | <b>1 (0.7)</b> | <b>6 (0.7)</b> |
| 24.5 mm             | 1               | 0              | 1              |
| 26 mm               | 3               | 0              | 3              |
| 27.5 mm             | 1               | 0              | 1              |
| 29 mm               | 1               | 1              | 0              |
| 30.5 mm             | 1               | 0              | 1              |
| <b>Prizvalve</b>    | <b>5 (0.5)</b>  | <b>3 (2.2)</b> | <b>2 (0.2)</b> |
| 23 mm               | 1               | 1              | 0              |
| 26 mm               | 1               | 0              | 1              |
| 29 mm               | 3               | 2              | 1              |
| <b>Taurus Valve</b> | <b>2 (0.2)</b>  | <b>1 (0.7)</b> | <b>1 (0.1)</b> |
| 29 mm               | 2               | 1              | 1              |

---

**Table S5. Two-sided test of the scaled Schoenfeld residuals over time**

| <b>Outcome</b>                    | <b>Chi<sup>2</sup></b> | <b>df</b> | <b>P value</b> |
|-----------------------------------|------------------------|-----------|----------------|
| Major adverse events              | 19.16                  | 17        | 0.319          |
| All-cause death                   | 10.92                  | 17        | 0.861          |
| Cerebrovascular events            | 18.18                  | 17        | 0.378          |
| Hospitalization for heart failure | 22.36                  | 16        | 0.132          |
| Cardiovascular death              | 13.54                  | 17        | 0.6994         |

**Table S6. Subgroup analysis according to post-TAVR AR**

| Outcome                           | Post-TAVR No/Mild AR      |                           |                            |         | Post-TAVR Moderate/Severe AR |                          |                            |         | P for interaction |
|-----------------------------------|---------------------------|---------------------------|----------------------------|---------|------------------------------|--------------------------|----------------------------|---------|-------------------|
|                                   | Mixed BAV disease (n=125) | Pure BAV stenosis (n=787) | HR <sub>adj</sub> (95% CI) | P Value | Mixed BAV disease (n=8)      | Pure BAV stenosis (n=28) | HR <sub>adj</sub> (95% CI) | P Value |                   |
| MAE                               | 11 (8.8)                  | 127 (16.1)                | 0.49<br>(0.26-0.92)        | 0.026   | 0 (0.0)                      | 11 (39.3)                | -                          | -       | -                 |
| All-cause death                   | 7 (5.6)                   | 87 (11.1)                 | 0.44<br>(0.20-0.97)        | 0.041   | 0 (0.0)                      | 6 (21.4)                 | -                          | -       | -                 |
| Cerebrovascular events            | 4 (3.2)                   | 39 (5.0)                  | 0.67<br>(0.24-1.93)        | 0.463   | 0 (0.0)                      | 2 (7.1)                  | -                          | -       | -                 |
| Hospitalization for heart failure | 1 (0.8)                   | 18 (2.3)                  | 0.26<br>(0.03-2.06)        | 0.201   | 0 (0.0)                      | 4 (14.3)                 | -                          | -       | -                 |
| Cardiovascular death              | 1 (0.8)                   | 37 (4.7)                  | 0.12<br>(0.02-0.91)        | 0.041   | 0 (0.0)                      | 2 (7.1)                  | -                          | -       | -                 |

Adjusted for age, BSA, male sex, CAD, PAD, NYHA class, STS-PROM score, LVEF, eGFR, severe raphe calcification, severe annulus/LVOT calcification, pre-procedural MR grade.

Abbreviations: AR=aortic regurgitation; BSA=body surface area; CAD=coronary artery disease; CI=confidence interval; eGFR=estimated glomerular filtration rate; HR<sub>adj</sub>=adjusted hazard ratio; LVEF=left ventricular ejection fraction; LVOT=left ventricular outflow tract; MAE=major adverse events; MR=mitral regurgitation; NYHA=New York Heart Association; PAD=peripheral arterial disease; STS-PROM=Society of Thoracic Surgeons-Predicted Risk Of Mortality.

**Table S7. Subgroup analysis according to raphe calcification**

| Outcome                           | Severe raphe calcification (n=254) |                           |                            |         | Non-severe raphe calcification (n=702) |                           |                            |         | P for interaction |
|-----------------------------------|------------------------------------|---------------------------|----------------------------|---------|----------------------------------------|---------------------------|----------------------------|---------|-------------------|
|                                   | Mixed BAV disease (n=43)           | Pure BAV stenosis (n=211) | HR <sub>adj</sub> (95% CI) | P Value | Mixed BAV disease (n=91)               | Pure BAV stenosis (n=611) | HR <sub>adj</sub> (95% CI) | P Value |                   |
| MAE                               | 6 (14.0)                           | 36 (17.1)                 | 0.78<br>(0.30-2.03)        | 0.612   | 6 (6.69)                               | 108 (17.7)                | 0.33<br>(0.14-0.77)        | 0.010   | 0.104             |
| All-cause death                   | 4 (9.3)                            | 31 (14.7)                 | 0.55<br>(0.17-1.72)        | 0.301   | 4 (4.4)                                | 68 (11.1)                 | 0.37<br>(0.13-1.03)        | 0.056   | 0.494             |
| Cerebrovascular events            | 3 (7.0)                            | 9 (4.3)                   | 0.92<br>(0.16-5.20)        | 0.928   | 1 (1.1)                                | 33 (5.4)                  | 0.25<br>(0.03-1.83)        | 0.171   | 0.067             |
| Hospitalization for heart failure | 0 (0.0)                            | 3 (1.4)                   | -                          | -       | 1 (1.1)                                | 19 (3.1)                  | 0.27<br>(0.03-2.14)        | 0.215   | -                 |
| Cardiovascular death              | 1 (2.3)                            | 16 (7.6)                  | 0.17<br>(0.02-1.45)        | 0.105   | 1 (1.1)                                | 29 (4.7)                  | 0.21<br>(0.03-1.57)        | 0.127   | 0.873             |

Adjusted for age, BSA, male sex, CAD, PAD, NYHA class, STS-PROM score, LVEF, eGFR, severe raphe calcification, severe annulus/LVOT calcification, pre-procedural MR grade.

Abbreviations: AR=aortic regurgitation; BSA=body surface area; CAD=coronary artery disease; CI=confidence interval; eGFR=estimated glomerular filtration rate; HR<sub>adj</sub>=adjusted hazard ratio; LVEF=left ventricular ejection fraction; LVOT=left ventricular outflow tract; MAE=major adverse events; MR=mitral regurgitation; NYHA=New York Heart Association; PAD=peripheral arterial disease; STS-PROM=Society of Thoracic Surgeons-Predicted Risk Of Mortality.

**Table S8. Subgroup analysis according to raphe localization**

| Outcome                           | R-L (n=814)               |                           |                            |         | L-R or L-NC (n=142)       |                          |                            |         | P for interaction |
|-----------------------------------|---------------------------|---------------------------|----------------------------|---------|---------------------------|--------------------------|----------------------------|---------|-------------------|
|                                   | Mixed BAV disease (n=106) | Pure BAV stenosis (n=708) | HR <sub>adj</sub> (95% CI) | P Value | Mixed BAV disease (n=114) | Pure BAV stenosis (n=28) | HR <sub>adj</sub> (95% CI) | P Value |                   |
| MAE                               | 11 (10.4)                 | 129 (18.2)                | 0.53 (0.28-1.00)           | 0.054   | 1 (3.6)                   | 15 (13.2)                | 0.34 (0.04-3.28)           | 0.354   | 0.488             |
| All-cause death                   | 7 (6.6)                   | 88 (12.4)                 | 0.47 (0.21-1.05)           | 0.067   | 1 (3.6)                   | 11 (9.6)                 | 0.34 (0.03-4.32)           | 0.406   | 0.494             |
| Cerebrovascular events            | 4 (3.8)                   | 38 (5.4)                  | 0.78 (0.27-2.25)           | 0.647   | 0 (0.0)                   | 4 (3.5)                  | -                          | -       | -                 |
| Hospitalization for heart failure | 1 (0.9)                   | 21 (3.0)                  | 0.28 (0.04-2.20)           | 0.225   | 0 (0.0)                   | 1 (0.9)                  | -                          | -       | -                 |
| Cardiovascular death              | 2 (1.9)                   | 40 (5.6)                  | 0.26 (0.06-1.11)           | 0.068   | 0 (0.0)                   | 5 (4.4)                  | -                          | -       | -                 |

Adjusted for age, BSA, male sex, CAD, PAD, NYHA class, STS-PROM score, LVEF, eGFR, severe raphe calcification, severe annulus/LVOT calcification, pre-procedural MR grade.

Abbreviations: AR=aortic regurgitation; BSA=body surface area; CAD=coronary artery disease; CI=confidence interval; eGFR=estimated glomerular filtration rate; HR<sub>adj</sub>=adjusted hazard ratio; LVEF=left ventricular ejection fraction; LVOT=left ventricular outflow tract; MAE=major adverse events; MR=mitral regurgitation; NYHA=New York Heart Association; PAD=peripheral arterial disease; STS-PROM=Society of Thoracic Surgeons-Predicted Risk Of Mortality.

**Table S9. Sensitivity analysis stratified by baseline AR severity into three groups**

| Outcome                           | No AR<br>(n=442) | Mild AR<br>(n=380) | Moderate/Severe<br>AR (n=134) | Mild AR vs. No AR          |         | Moderate/Severe AR vs. No AR |         |
|-----------------------------------|------------------|--------------------|-------------------------------|----------------------------|---------|------------------------------|---------|
|                                   |                  |                    |                               | HR <sub>adj</sub> (95% CI) | P Value | HR <sub>adj</sub> (95% CI)   | P Value |
| MAE                               | 73 (16.5)        | 71 (18.7)          | 12 (9.0)                      | 0.96 (0.67-1.36)           | 0.803   | 0.46 (0.24-0.86)             | 0.015   |
| All-cause death                   | 54 (12.2)        | 45 (11.8)          | 8 (6.0)                       | 0.81 (0.53-1.25)           | 0.335   | 0.39 (0.18-0.85)             | 0.018   |
| Cerebrovascular events            | 22 (5.0)         | 20 (5.3)           | 4 (3.0)                       | 0.84 (0.44-1.59)           | 0.583   | 0.55 (0.18-1.66)             | 0.290   |
| Hospitalization for heart failure | 11 (2.5)         | 11 (2.9)           | 1 (0.7)                       | 1.02 (0.40-2.62)           | 0.966   | 0.25 (0.03-2.04)             | 0.194   |
| Cardiovascular death              | 26 (5.9)         | 19 (5.0)           | 2 (1.5)                       | 0.75 (0.39-1.44)           | 0.384   | 0.18 (0.04-0.81)             | 0.025   |

Adjusted for age, BSA, male sex, CAD, PAD, NYHA class, STS-PROM score, LVEF, eGFR, severe raphe calcification, severe annulus/LVOT calcification, pre-procedural MR grade.

Abbreviations: AR=aortic regurgitation; BSA=body surface area; CAD=coronary artery disease; CI=confidence interval; eGFR=estimated glomerular filtration rate; HR<sub>adj</sub>=adjusted hazard ratio; LVEF=left ventricular ejection fraction; LVOT=left ventricular outflow tract; MAE=major adverse events; MR=mitral regurgitation; NYHA=New York Heart Association; PAD=peripheral arterial disease; STS-PROM=Society of Thoracic Surgeons-Predicted Risk Of Mortality.
